# Supplementary material for: Growth Differentiation Factor-15–Induced Contractile Activity and Extracellular Matrix Production in Human Trabecular Meshwork Cells
Source: PubMed Central journal article supplement — Invest Ophthalmol Vis Sci. 2016 Dec;57(15):6482–95. doi: 10.1167/iovs.16-20671 (PMC5152563; doi:10.1167/iovs.16-20671), 2016-12
Supplement: iovs-57-14-37_s01.pdf [file iovs-57-14-37_s01.pdf]

**Supplementary Table S1.** Identification of GDF-15 induced gene expression in human TM cells based on cDNA microarray analysis

| <b>Representative public ID</b> | <b>Gene title</b>                                                                              | <b>Gene symbol</b>    | <b>Fold change</b> |
|---------------------------------|------------------------------------------------------------------------------------------------|-----------------------|--------------------|
| BC038806                        | Pleckstrin homology-like domain, family b, member 2                                            | PHLDB2                | 90.51              |
| AU156801                        | Ras protein activator like 2                                                                   | RASAL2                | 63.61              |
| BC030276                        | Leucine rich repeat containing 63                                                              | LRRC63                | 33.05              |
| BM662141                        | Dynein, cytoplasmic 1, heavy chain 1                                                           | DYNC1H1               | 32.73              |
| N51564                          | Peroxisomal biogenesis factor 5-like                                                           | PEX5L                 | 30.91              |
| AI280090                        | Uncharacterized loc101929660                                                                   | CTD-2118P12.1         | 28.70              |
| AL049698                        | Myeloid/lymphoid or mixed-lineage leukemia (trithorax homolog, drosophila); translocated to, 4 | MLLT4                 | 27.90              |
| NM_004678                       | Basic charge, y-linked, 2                                                                      | BPY2                  | 27.20              |
| BU561160                        | Ddb1 and cul4 associated factor 4-like 1                                                       | DCAF4L1               | 23.41              |
| NM_016511                       | C-type lectin domain family 1, member a                                                        | CLEC1A                | 23.32              |
| AL833418                        | Pancreatic lipase-related protein 3                                                            | PNLIPRP3              | 19.42              |
| AK095510                        | Zinc finger protein 718                                                                        | ZNF718                | 18.89              |
| BC018764                        | Kiaa1217                                                                                       | KIAA1217              | 18.86              |
| BC035329                        | Sorbin and sh3 domain containing 2                                                             | SORBS2                | 18.58              |
| AK024912                        | Nima (never in mitosis gene a)-related kinase 1                                                | NEK1                  | 18.14              |
| NM_001855                       | Collagen, type xv, alpha 1                                                                     | COL15A1               | 16.63              |
| BG109597                        | Prkc, apoptosis, wt1, regulator                                                                | pawr                  | 16.60              |
| AF075104                        | Zinc finger protein 622                                                                        | ZNF622                | 16.54              |
| BC029452                        | Sodium channel, voltage-gated, type ix, alpha subunit                                          | SCN9A                 | 15.87              |
| NM_014927                       | Connector enhancer of kinase suppressor of ras 2                                               | CNKSR2                | 15.78              |
| BC036933                        | Uncharacterized loc401220                                                                      | LOC401220             | 14.52              |
| BG944179                        | Small nucleolar rna, c/d box 8                                                                 | SNORD8                | 14.02              |
| BF982548                        | Trub pseudouridine (psi) synthase homolog 1 (e. Coli)                                          | TRUB1                 | 13.67              |
| AI032730                        | Serine/threonine kinase 38                                                                     | stk38                 | 13.26              |
| BC043419                        | Homo sapiens cdna clone image:5286775                                                          | ---                   | 13.03              |
| AF355799                        | Defensin, theta 1 pseudogene /// defensin, theta 1 pseudogene 2                                | DEFT1P ///<br>DEFT1P2 | 12.84              |
| AF232217                        | Pregnancy-induced hypertension syndrome-related protein                                        | PIH2                  | 12.10              |
| AA729772                        | Uncharacterized loc100506021                                                                   | LOC100506021          | 12.02              |

|           |                                                                                                                                              |                                           |       |
|-----------|----------------------------------------------------------------------------------------------------------------------------------------------|-------------------------------------------|-------|
| BC005399  | Leucine-rich repeats and iq motif containing 1                                                                                               | LRRIQ1                                    | 11.83 |
| S78159    | Runt-related transcription factor 1; translocated to, 1 (cyclin d-related)                                                                   | RUNX1T1                                   | 11.63 |
| AL039389  | Uncharacterized loc100653171 /// pom121 transmembrane nucleoporin-like 10, pseudogene /// pom121 transmembrane nucleoporin-like 4 pseudogene | LOC100653171 /// POM121L10P /// POM121L4P | 11.61 |
| BU621663  | Nmda receptor regulated 2                                                                                                                    | NARG2                                     | 11.28 |
| BC022435  | Homo sapiens cdna clone image:4280848                                                                                                        | ---                                       | 11.16 |
| BC001003  | Synovial sarcoma, x breakpoint 1                                                                                                             | SSX1                                      | 10.80 |
| AB033083  | Kiaa1257                                                                                                                                     | KIAA1257                                  | 10.50 |
| AU147515  | Thrb intronic transcript 1 (non-protein coding) /// ---                                                                                      | THRB-IT1 /// THRB-IT1                     | 10.41 |
| AL832701  | Inositol 1,4,5-triphosphate receptor, type 1                                                                                                 | ITPR1                                     | 10.31 |
| BC036416  | Striatin, calmodulin binding protein                                                                                                         | STRN                                      | 10.28 |
| AF161366  | Homo sapiens hspc103 mrna                                                                                                                    | ---                                       | 10.27 |
| BC035510  | Sialophorin                                                                                                                                  | SPN                                       | 10.13 |
| BC020672  | Natural killer-tumor recognition sequence                                                                                                    | NKTR                                      | 10.11 |
| BC037234  | Chromosome 15 open reading frame 29                                                                                                          | C15orf29                                  | 9.71  |
| BF431050  | Taf15 rna polymerase ii, tata box binding protein (tbp)-associated factor, 68kda                                                             | taf15                                     | 9.68  |
| AI040777  | Zinc finger, mym-type 4                                                                                                                      | ZMYM4                                     | 9.53  |
| BF508014  | Bromodomain containing 4                                                                                                                     | brd4                                      | 9.44  |
| AW081879  | Uveal autoantigen with coiled-coil domains and ankyrin repeats                                                                               | UACA                                      | 9.25  |
| AI393740  | Tg60c09.x1 soares_nsf_f8_9w_ot_pa_p_s1 homo sapiens cdna clone                                                                               | ---                                       | 9.08  |
| NM_024534 | Endogenous retrovirus group mer34, member 1                                                                                                  | ERVMER34-1                                | 8.89  |
| AF147422  | Kif1bp kif1 binding protein                                                                                                                  | KIAA1279                                  | 8.88  |
| BC017416  | Homo sapiens, clone image:4663740, mrna                                                                                                      | ---                                       | 8.75  |
| NM_005807 | Proteoglycan 4                                                                                                                               | PRG4                                      | 8.73  |
| AF147782  | Ets variant 7                                                                                                                                | ETV7                                      | 8.56  |
| AW151541  | Star-related lipid transfer (start) domain containing 10                                                                                     | stard10                                   | 8.52  |
| BC039507  | Uncharacterized loc101927606                                                                                                                 | LOC101927606                              | 8.47  |
| AI218542  | Hect, c2 and ww domain containing e3 ubiquitin protein ligase 2                                                                              | HECW2                                     | 8.46  |
| BF723605  | Neuronal cell adhesion molecule                                                                                                              | NRCAM                                     | 8.11  |
| NM_000785 | Cytochrome p450, family 27, subfamily b,                                                                                                     | CYP27B1                                   | 7.87  |

|           |                                                                                       |              |      |
|-----------|---------------------------------------------------------------------------------------|--------------|------|
|           | polypeptide 1                                                                         |              |      |
| AK093628  | Cdna flj36309 fis, clone thymu2004986                                                 | ---          | 7.80 |
| AI823546  | Transcribed locus                                                                     | ---          | 7.75 |
| NM_003856 | Interleukin 1 receptor-like 1                                                         | IL1RL1       | 7.74 |
| R05895    | Serine/arginine-rich splicing factor 4                                                | SRSF4        | 7.58 |
| BF058771  | Inositol-3-phosphate synthase 1                                                       | ISYNA1       | 7.53 |
| H18218    | Kansl1 kat8 regulatory nsl complex subunit 1                                          | KIAA1267     | 7.26 |
| BF110088  | 7n45g11.x1 nci_cgap_lu24 homo sapiens cdna clone                                      | ---          | 7.14 |
| AI276593  | Son of sevenless homolog 2 (drosophila)                                               | SOS2         | 7.14 |
| AI277977  | Sperm flagellar 2                                                                     | SPEF2        | 6.99 |
| W22152    | Arginine-glutamic acid dipeptide (re) repeats                                         | RERE         | 6.93 |
| AJ301610  | Glutamate receptor, ionotropic, kainate 2                                             | GRIK2        | 6.81 |
| BC038104  | Regulator of chromosome condensation (rcc1) and btb (poz) domain containing protein 1 | RCBTB1       | 6.70 |
| U34846    | Aquaporin 4                                                                           | AQP4         | 6.65 |
| AA636132  | Niemann-pick disease, type c1                                                         | NPC1         | 6.48 |
| AI022387  | Heterogeneous nuclear ribonucleoprotein h1 (h)                                        | HNRNPH1      | 6.43 |
| AY026505  | Kinesin family member 2c                                                              | KIF2C        | 6.43 |
| AL133570  | Round spermatid basic protein 1-like                                                  | RSBN1L       | 6.42 |
| AI935710  | Flavin containing monooxygenase 5                                                     | FMO5         | 6.17 |
| BC002874  | Dihydropyrimidinase-like 5                                                            | DPYSL5       | 6.13 |
| BC014056  | Homo sapiens, clone                                                                   | ---          | 6.12 |
| Z70200    | Small nuclear ribonucleoprotein 200kda (u5)                                           | SNRNP200     | 6.11 |
| AA532851  | Bai1-associated protein 2-like 2                                                      | BAIAP2L2     | 6.00 |
| AU157078  | Phosphodiesterase 4d interacting protein                                              | PDE4DIP      | 5.90 |
| AW298590  | Zfand4 zinc finger an1-type containing 4                                              | Anub11       | 5.83 |
| AW470942  | B-cell receptor-associated protein 29                                                 | BCAP29       | 5.78 |
| AF036973  | Major histocompatibility complex, class i, k (pseudogene)                             | ---          | 5.68 |
| BC006295  | Axin 2                                                                                | AXIN2        | 5.67 |
| BG287503  | Serine palmitoyltransferase, small subunit b                                          | SPTSSB       | 5.66 |
| AF130044  | Pro0419                                                                               | LOC100132661 | 5.60 |
| AW298710  | ---                                                                                   | ---          | 5.57 |
| AA677057  | Fc receptor-like 1                                                                    | FCRL1        | 5.53 |
| NM_152507 | Chromosome 21 open reading frame 128                                                  | C21orf128    | 5.52 |
| AK021494  | Chloride channel, voltage-sensitive 5                                                 | CLCN5        | 5.46 |

|           |                                                                                                                               |                      |      |
|-----------|-------------------------------------------------------------------------------------------------------------------------------|----------------------|------|
| AF060223  | Polymerase (rna) iii (dna directed) polypeptide k, 12.3 kda                                                                   | POLR3K               | 5.45 |
| AF332238  | Testis-specific transcript, y-linked 9a (non-protein coding) /// testis-specific transcript, y-linked 9b (non-protein coding) | TTTY9A ///<br>TTTY9B | 5.45 |
| NM_015967 | Protein tyrosine phosphatase, non-receptor type 22 (lymphoid)                                                                 | PTPN22               | 5.44 |
| AI928035  | Iroquois homeobox 2                                                                                                           | IRX2                 | 5.90 |
| AI693143  | Gnas complex locus                                                                                                            | GNAS                 | 5.38 |
| AL523099  | Calsyntenin 1                                                                                                                 | CLSTN1               | 5.37 |
| NM_017534 | Myosin, heavy chain 2, skeletal muscle, adult /// myosin, heavy chain 4, skeletal muscle                                      | MYH2 ///<br>MYH4     | 5.36 |
| BC033352  | ---                                                                                                                           | ---                  | 5.28 |
| BF508977  | Signal transducer and activator of transcription 3 (acute-phase response factor)                                              | STAT3                | 5.27 |
| AI188346  | Angel homolog 2 (drosophila)                                                                                                  | ANGEL2               | 5.20 |
| BC007859  | Myeloid/lymphoid or mixed-lineage leukemia (trithorax homolog, drosophila); translocated to, 6                                | MLLT6                | 5.20 |
| NM_018338 | Wd repeat domain 52                                                                                                           | WDR52                | 5.10 |
| H48516    | Deleted in lymphocytic leukemia 2 (non-protein coding)                                                                        | DLEU2                | 4.97 |
| AF053356  | Erythropoietin                                                                                                                | EPO                  | 4.92 |
| BC032544  | Intracisternal a particle-promoted polypeptide                                                                                | IPP                  | 4.90 |
| AU150300  | Zinc finger, dhhc-type containing 11                                                                                          | ZDHHC11              | 4.87 |
| AA167563  | Cobw domain containing 6; cobw domain containing 1                                                                            | CBWD1/<br>CBWD6      | 4.83 |
| AF147429  | Dead (asp-glu-ala-asp) box polypeptide 42                                                                                     | DDX42                | 4.79 |
| AF281865  | Phosphodiesterase 11a                                                                                                         | PDE11A               | 4.65 |
| BC026292  | ---                                                                                                                           | ---                  | 4.64 |
| NM_007176 | Chromosome 14 open reading frame 1                                                                                            | C14orf1              | 4.46 |
| AU145144  | Nck adaptor protein 1                                                                                                         | NCK1                 | 4.43 |
| F35496    | Uncharacterized loc101929592                                                                                                  | LOC10192959<br>2     | 4.41 |
| AL160175  | Dual specificity phosphatase 15                                                                                               | DUSP15               | 4.34 |
| BC009036  | Rab11 family interacting protein 3 (class ii)                                                                                 | RAB11FIP3            | 4.18 |
| AA749167  | Zinc finger protein 24                                                                                                        | ZNF24                | 4.12 |
| AW299534  | Rho/rac guanine nucleotide exchange factor (gef) 2                                                                            | ARHGEF2              | 4.10 |
| AI269290  | Solute carrier family 18 (vesicular monoamine), member 2                                                                      | SLC18A2              | 4.05 |

|           |                                                                                                                                                                                          |                                                       |      |
|-----------|------------------------------------------------------------------------------------------------------------------------------------------------------------------------------------------|-------------------------------------------------------|------|
| T47960    | Butyrophilin-like 9                                                                                                                                                                      | BTNL9                                                 | 4.04 |
| BC026308  | Hypoxia inducible factor 3, alpha subunit                                                                                                                                                | HIF3A                                                 | 4.04 |
| BE018269  | Chromosome 7 open reading frame 73 /// chromosome 7 open reading frame 73 pseudogene /// uncharacterized loc100508939 /// solute carrier family 13 (sodium/sulfate symporters), member 4 | C7orf73 /// LOC100289196 /// LOC100508939 /// SLC13A4 | 4.04 |
| AF007194  | Homo sapiens cdna flj39484 fis, clone prost2014925. /// ---                                                                                                                              | AK096803 /// RP11-395B7.2                             | 4.01 |
| NM_173633 | Transmembrane protein 145                                                                                                                                                                | TMEM145                                               | 4.01 |
| AI079329  | Family with sequence similarity 164, member a                                                                                                                                            | FAM164A                                               | 3.98 |
| AW074773  | Hexosaminidase (glycosyl hydrolase family 20, catalytic domain) containing                                                                                                               | HEXDC                                                 | 3.97 |
| NM_153264 | Collagen, type vi, alpha 5                                                                                                                                                               | COL6A5                                                | 3.97 |
| AK092592  | Ccdc28a coiled-coil domain containing 28a                                                                                                                                                | CCDC28A                                               | 3.89 |
| NM_015227 | Protein o-fucosyltransferase 2                                                                                                                                                           | POFUT2                                                | 3.84 |
| NM_013439 | Paired immunoglobulin-like type 2 receptor alpha                                                                                                                                         | PILRA                                                 | 3.80 |
| AL512696  | ---                                                                                                                                                                                      | ---                                                   | 3.73 |
| BC028044  | Homo sapiens, clone image:5392784, mrna.                                                                                                                                                 | BC028044                                              | 3.72 |
| AA677629  | 5'-nucleotidase, cytosolic ii                                                                                                                                                            | NT5C2                                                 | 3.67 |
| AI074617  | Wd repeat domain 61                                                                                                                                                                      | WDR61                                                 | 3.64 |
| BC003172  | Ccar2 cell cycle and apoptosis regulator 2                                                                                                                                               | KIAA1967                                              | 3.64 |
| BE466925  | Small nuclear ribonucleoprotein polypeptide b                                                                                                                                            | SNRPB2                                                | 3.61 |
| BC017814  | Mitogen-activated protein kinase kinase kinase 2                                                                                                                                         | MAP3K2                                                | 3.55 |
| U85943    | Rae1 rna export 1 homolog (s. Pombe)                                                                                                                                                     | RAE1                                                  | 3.55 |
| BC008884  | Tyrosine kinase, non-receptor, 2                                                                                                                                                         | TNK2                                                  | 3.53 |
| AI346359  | Wd repeat domain 52                                                                                                                                                                      | WDR52                                                 | 3.52 |
| BC018531  | Potassium inwardly-rectifying channel, subfamily j, member 5                                                                                                                             | Kcnj5                                                 | 3.52 |
| AL707919  | Pdz and lim domain 3                                                                                                                                                                     | PDLIM3                                                | 3.52 |
| AF306674  | T-complex 11 (mouse)-like 2                                                                                                                                                              | TCPI1L2                                               | 3.52 |
| NM_015703 | Ribosomal rna processing 7 homolog a (s. Cerevisiae) /// ribosomal rna processing 7 homolog b (s. Cerevisiae)                                                                            | RRP7A /// RRP7B                                       | 3.52 |
| N74058    | Ferm, rhogef (arhgef) and pleckstrin domain protein 1 (chondrocyte-derived)                                                                                                              | FARP1                                                 | 3.48 |
| AW863675  | Ring finger protein 24                                                                                                                                                                   | RNF24                                                 | 3.44 |
| M34428    | Microrna 1204                                                                                                                                                                            | MIR1204                                               | 3.40 |

|           |                                                                                                                                    |                                         |      |
|-----------|------------------------------------------------------------------------------------------------------------------------------------|-----------------------------------------|------|
| AE000661  | Homo sapiens mrna for t cell receptor alpha variable 40, partial cds, clone: un 107. /// t cell receptor alpha variable 40 /// --- | TCR- alpha V 33.1 /// TRAV40 /// TRAV40 | 3.40 |
| AI553825  | ---                                                                                                                                | ---                                     | 3.40 |
| BE780834  | Nudix (nucleoside diphosphate linked moiety x)-type motif 16                                                                       | NUDT16                                  | 3.38 |
| AW118214  | Leucine rich repeat containing 4c                                                                                                  | LRRC4C                                  | 3.33 |
| BF843343  | Peroxiredoxin 6                                                                                                                    | Prdx6                                   | 3.33 |
| AW081561  | Uncharacterized serine/threonine-protein kinase sgk494                                                                             | SGK494                                  | 3.30 |
| AW576405  | Deltex homolog 1 (drosophila)                                                                                                      | DTX1                                    | 3.29 |
| AA768866  | Rna binding motif protein 39                                                                                                       | RBM39                                   | 3.28 |
| AF131787  | Uncharacterized loc100506527                                                                                                       | LOC100506527                            | 3.27 |
| AU148222  | Hephaestin                                                                                                                         | HEPH                                    | 3.25 |
| AA609987  | Integrin, beta 6                                                                                                                   | ITGB6                                   | 3.24 |
| BC017990  | ---                                                                                                                                | ---                                     | 3.22 |
| NM_000212 | Integrin, beta 3 (platelet glycoprotein iiiia, antigen cd61)                                                                       | ITGB3                                   | 3.19 |
| U17033    | Phospholipase a2 receptor 1, 180kda                                                                                                | PLA2R1                                  | 3.17 |
| AA404231  | Tudor domain containing 6                                                                                                          | TDRD6                                   | 3.16 |
| AL442094  | Transcription factor 12                                                                                                            | TCF12                                   | 3.13 |
| AK000970  | Membrane-associated ring finger (c3hc4) 6, e3 ubiquitin protein ligase                                                             | 6-Mar                                   | 3.11 |
| AF130062  | Clathrin, heavy chain (hc)                                                                                                         | CLTC                                    | 3.09 |
| AL109717  | 5,10-methenyltetrahydrofolate synthetase (5-formyltetrahydrofolate cyclo-ligase) /// st20-mthfs readthrough                        | MTHFS /// ST20-MTHFS                    | 3.08 |
| T67481    | Zinc finger protein 182                                                                                                            | ZNF182                                  | 3.08 |
| AA534466  | Ctif cbp80/20-dependent translation initiation factor                                                                              | KIAA0427                                | 3.05 |
| AF339818  | ---                                                                                                                                | ---                                     | 3.05 |
| AW085690  | Lectin, galactoside-binding, soluble, 3                                                                                            | LGALS3                                  | 3.00 |
| AF507950  | Long intergenic non-protein coding rna 32                                                                                          | LINC00032                               | 2.97 |
| AU150385  | Death associated protein 3                                                                                                         | DAP3                                    | 2.96 |
| AU159344  | Neuropilin 2                                                                                                                       | NRP2                                    | 2.96 |
| AI275020  | Placenta-specific 9                                                                                                                | PLAC9                                   | 2.95 |
| AU155612  | Calcium/calmodulin-dependent protein kinase ii gamma                                                                               | CAMK2G                                  | 2.95 |
| N32776    | Unc-119 homolog b (c. Elegans)                                                                                                     | UNC119B                                 | 2.94 |
| AL833207  | F-box protein 42                                                                                                                   | FBXO42                                  | 2.93 |
| AK097381  | Uncharacterized loc400680                                                                                                          | LOC400680                               | 2.91 |
| W58344    | Dishevelled associated activator of                                                                                                | DAAM2                                   | 2.90 |

|           |                                                                              |                               |      |
|-----------|------------------------------------------------------------------------------|-------------------------------|------|
|           | morphogenesis 2                                                              |                               |      |
| NM_021603 | Fxyd domain containing ion transport regulator 2 /// fxyd6-fxyd2 readthrough | FXYD2 ///<br>FXVD6-<br>FXVD2  | 2.90 |
| AI215629  | Phosphoenolpyruvate carboxykinase 2 (mitochondrial)                          | pck2                          | 2.87 |
| AI143641  | Uncharacterized loc100506860                                                 | LOC100506860                  | 2.85 |
| AI809752  | Uncharacterized loc100131096                                                 | LOC100131096                  | 2.84 |
| BM352108  | Chaperonin containing tcp1, subunit 5 (epsilon)                              | CCT5                          | 2.84 |
| AA132448  | Mucin 20, cell surface associated                                            | MUC20                         | 2.81 |
| BC019922  | Zinc finger protein 252, pseudogene                                          | ZNF252P                       | 2.81 |
| NM_153203 | Long intergenic non-protein coding rna 308                                   | LINC00308                     | 2.78 |
| NM_000219 | Potassium voltage-gated channel, isk-related family, member 1                | KCNE1                         | 2.78 |
| NM_014659 | Diphosphoinositol pentakisphosphate kinase 1                                 | PPIP5K1                       | 2.77 |
| NM_002651 | Phosphatidylinositol 4-kinase, catalytic, beta                               | PI4KB                         | 2.73 |
| AW771472  | Anoctamin 4                                                                  | ANO4                          | 2.72 |
| AW274311  | Basic, immunoglobulin-like variable motif containing                         | BIVM                          | 2.72 |
| AL533838  | Tubulin, beta 2b class iib                                                   | TUBB2B                        | 2.71 |
| AA251561  | Ubiquitin-like modifier activating enzyme 6                                  | UBA6                          | 2.71 |
| BC034740  | Transient receptor potential cation channel, subfamily v, member 5           | TRPV5                         | 2.70 |
| BC017579  | Myb-like, swirm and mpn domains 1                                            | MYSM1                         | 2.69 |
| AU145463  | Spidr scaffolding protein involved in dna repair                             | KIAA0146                      | 2.69 |
| AK024569  | Cornichon homolog 4 (drosophila)                                             | CNIH4                         | 2.67 |
| AW873606  | Enah/vasp-like                                                               | EVL                           | 2.66 |
| NM_022898 | B-cell cll/lymphoma 11b (zinc finger protein)                                | BCL11B                        | 2.66 |
| AI311458  | Rar-related orphan receptor a                                                | RORA                          | 2.65 |
| BF514791  | Pseudouridylate synthase 10                                                  | PUS10                         | 2.64 |
| NM_017894 | Zinc finger and scan domain containing 2                                     | ZSCAN2                        | 2.64 |
| AL038191  | Myotubularin related protein 3                                               | MTMR3                         | 2.64 |
| AF147415  | Spermatogenesis associated, serine-rich 2-like                               | Spats2l                       | 2.63 |
| AW452796  | Uncharacterized loc100506453 /// zinc finger protein 839 pseudogene          | LOC100506453 ///<br>LOC389906 | 2.63 |

|           |                                                                                              |                      |      |
|-----------|----------------------------------------------------------------------------------------------|----------------------|------|
| AW082633  | Sh3 domain containing ring finger 2                                                          | SH3RF2               | 2.62 |
| BC027932  | Potassium voltage-gated channel, delayed-rectifier, subfamily s, member 2                    | KCNS2                | 2.60 |
| AI523450  | Scai suppressor of cancer cell invasion                                                      | Scai                 | 2.59 |
| AW452022  | Outer dense fiber of sperm tails 2-like                                                      | ODF2L                | 2.59 |
| AV650867  | ---                                                                                          | ---                  | 2.58 |
| NM_005156 | Polypyrimidine tract binding protein 3                                                       | PTBP3                | 2.58 |
| BF339860  | Clusterin                                                                                    | CLU                  | 2.58 |
| BM983749  | Mpv17 mitochondrial membrane protein-like                                                    | MPV17L               | 2.57 |
| AF255792  | Llp homolog, long-term synaptic facilitation (aplysia)                                       | LLPH                 | 2.56 |
| AI632692  | Potassium inwardly-rectifying channel, subfamily j, member 15                                | KCNJ15               | 2.56 |
| BF509219  | Protein-l-isoaspartate (d-aspartate) o-methyltransferase domain containing 2                 | PCMTD2               | 2.56 |
| BC039487  | Homo sapiens, clone image:5538960, mrna.                                                     | BC039487             | 2.56 |
| BE674920  | Adp-ribosylation factor-like 17a /// adp-ribosylation factor-like 17b                        | ARL17A ///<br>ARL17B | 2.56 |
| AI498484  | Zinc finger protein 286a                                                                     | ZNF286A              | 2.55 |
| AF547222  | Anti-cng alpha 1 cation channel translation product-like                                     | LOC280665            | 2.55 |
| BC037875  | Uncharacterized loc285593                                                                    | LOC285593            | 2.55 |
| AI755057  | ---                                                                                          | ---                  | 2.55 |
| BC040953  | Peroxisomal biogenesis factor 13                                                             | PEX13                | 2.54 |
| BC016065  | Coq9 coenzyme q9                                                                             | Coq9                 | 2.54 |
| BC006143  | V-maf musculoaponeurotic fibrosarcoma oncogene homolog g (avian)                             | MAFG                 | 2.54 |
| NM_005761 | Plexin c1                                                                                    | PLXNC1               | 2.54 |
| BE501995  | Adp-ribosylation factor 3                                                                    | ARF3                 | 2.54 |
| R94644    | Versican                                                                                     | VCAN                 | 2.54 |
| BC016002  | Pleckstrin homology domain containing, family a (phosphoinositide binding specific) member 8 | PLEKHA8              | 2.53 |
| NM_006314 | Connector enhancer of kinase suppressor of ras 1                                             | CNKSR1               | 2.52 |
| AI922404  | ---                                                                                          | ---                  | 2.51 |
| AK026712  | Proline rich 14-like                                                                         | PRR14L               | 2.51 |
| AI933671  | Centrosome and spindle pole associated protein 1                                             | CSPP1                | 2.50 |
| AV752139  | Uncharacterized loc646113                                                                    | FLJ43390             | 2.50 |
| BC014583  | Coronin, actin binding protein, 1c                                                           | CORO1C               | 2.50 |
| NM_000960 | Prostaglandin i2 (prostacyclin) receptor                                                     | PTGIR                | 2.49 |



|           |                                                                                  |                  |      |
|-----------|----------------------------------------------------------------------------------|------------------|------|
|           | (ip)                                                                             |                  |      |
| BF696056  | Urotensin 2 domain containing                                                    | UTS2D            | 2.49 |
| AV717590  | Ectonucleoside triphosphate diphosphohydrolase 1                                 | ENTPD1           | 2.49 |
| AK024269  | Tight junction associated protein 1 (peripheral)                                 | TJAP1            | 2.48 |
| NM_005084 | Phospholipase a2, group vii (platelet-activating factor acetylhydrolase, plasma) | PLA2G7           | 2.48 |
| AU148255  | ---                                                                              | ---              | 2.48 |
| BC008637  | Proteasome (prosome, macropain) 26s subunit, non-atpase, 5                       | PSMD5            | 2.47 |
| AI860021  | Cyclin-dependent kinase 12                                                       | CDK12            | 2.46 |
| BC026005  | Fibronectin type iii domain containing 3b                                        | FNDC3B           | 2.46 |
| BF972355  | Ring finger and ccch-type domains 2                                              | RC3H2            | 2.45 |
| NM_017935 | B-cell scaffold protein with ankyrin repeats 1                                   | BANK1            | 2.45 |
| AA582460  | Ribosomal protein l5 /// small nucleolar rna, c/d box 21                         | RPL5 /// SNORD21 | 2.44 |
| AL045306  | Nudix (nucleoside diphosphate linked moiety x)-type motif 10                     | NUDT10           | 2.43 |
| BC024029  | Long intergenic non-protein coding rna 423                                       | LINC00423        | 2.43 |
| AI927957  | Exportin 7                                                                       | XPO7             | 2.43 |
| R95743    | ---                                                                              | ---              | 2.43 |
| AA604601  | ---                                                                              | ---              | 2.41 |
| AA747303  | Exosome component 3                                                              | EXOSC3           | 2.41 |
| AF079408  | Hemochromatosis                                                                  | HFE              | 2.41 |
| BC031280  | Rad21 antisense rna 1 (non-protein coding)                                       | RAD21-AS1        | 2.41 |
| BF508689  | Zinc finger protein 311                                                          | ZNF311           | 2.41 |
| NM_173677 | Uncharacterized loc285962                                                        | FLJ40852         | 2.41 |
| AI829734  | ---                                                                              | ---              | 2.40 |
| AI871655  | Syntaxin 3                                                                       | STX3             | 2.40 |
| BE219874  | ---                                                                              | ---              | 2.39 |
| AA400269  | Alpha-methylacyl-coa racemase                                                    | AMACR            | 2.38 |
| BF111276  | Internexin neuronal intermediate filament protein, alpha                         | INA              | 2.38 |
| BC040662  | Catenin (cadherin-associated protein), alpha 3                                   | CTNNA3           | 2.38 |
| J03866    | Dihydrolipoamide s-acetyltransferase                                             | DLAT             | 2.38 |
| AA827922  | Uncharacterized loc100506983                                                     | LOC100506983     | 2.37 |
| AK026714  | Pellino e3 ubiquitin protein ligase 1                                            | PELI1            | 2.37 |
| BE551219  | Claudin 18                                                                       | CLDN18           | 2.36 |

|           |                                                                                                                                                                                                                                                                           |                                                                                                                                                          |      |
|-----------|---------------------------------------------------------------------------------------------------------------------------------------------------------------------------------------------------------------------------------------------------------------------------|----------------------------------------------------------------------------------------------------------------------------------------------------------|------|
| NM_016950 | Sparc/osteonectin, cwcv and kazal-like domains proteoglycan (testican) 3                                                                                                                                                                                                  | SPOCK3                                                                                                                                                   | 2.36 |
| AI767756  | Heparan sulfate 6-o-sulfotransferase 2                                                                                                                                                                                                                                    | HS6ST2                                                                                                                                                   | 2.36 |
| X06399    | Cytochrome p450, family 2, subfamily b, polypeptide 6                                                                                                                                                                                                                     | CYP2B6                                                                                                                                                   | 2.36 |
| AI805700  | Ptk2 protein tyrosine kinase 2                                                                                                                                                                                                                                            | PTK2                                                                                                                                                     | 2.35 |
| NM_025010 | Kelch-like 18 (drosophila)                                                                                                                                                                                                                                                | KLHL18                                                                                                                                                   | 2.35 |
| AA878383  | Bestrophin 3                                                                                                                                                                                                                                                              | BEST3                                                                                                                                                    | 2.34 |
| BE535717  | Methyl-cpg binding domain protein 3                                                                                                                                                                                                                                       | MBD3                                                                                                                                                     | 2.34 |
| AI424872  | Uncharacterized loc100505915                                                                                                                                                                                                                                              | LOC100505915                                                                                                                                             | 2.33 |
| BC041456  | Long intergenic non-protein coding rna 1231                                                                                                                                                                                                                               | LINC01231                                                                                                                                                | 2.33 |
| NM_014592 | Kv channel interacting protein 1                                                                                                                                                                                                                                          | KCNIP1                                                                                                                                                   | 2.32 |
| AF197569  | Chromosome 3 open reading frame 78                                                                                                                                                                                                                                        | C3orf78                                                                                                                                                  | 2.32 |
| NM_018843 | Solute carrier family 25, member 40                                                                                                                                                                                                                                       | SLC25A40                                                                                                                                                 | 2.32 |
| AI860775  | Pr domain containing 6                                                                                                                                                                                                                                                    | PRDM6                                                                                                                                                    | 2.32 |
| NM_003537 | Histone cluster 1, h3a /// histone cluster 1, h3b /// histone cluster 1, h3c /// histone cluster 1, h3d /// histone cluster 1, h3e /// histone cluster 1, h3f /// histone cluster 1, h3g /// histone cluster 1, h3h /// histone cluster 1, h3i /// histone cluster 1, h3j | HIST1H3A ///<br>HIST1H3B ///<br>HIST1H3C ///<br>HIST1H3D ///<br>HIST1H3E ///<br>HIST1H3F ///<br>HIST1H3G ///<br>HIST1H3H ///<br>HIST1H3I ///<br>HIST1H3J | 2.31 |
| NM_004949 | Desmocollin 2                                                                                                                                                                                                                                                             | DSC2                                                                                                                                                     | 2.31 |
| AA456945  | ---                                                                                                                                                                                                                                                                       | ---                                                                                                                                                      | 2.30 |
| NM_005771 | Dehydrogenase/reductase (sdr family) member 9                                                                                                                                                                                                                             | DHRS9                                                                                                                                                    | 2.30 |
| BG677577  | Retinol dehydrogenase 10 (all-trans)                                                                                                                                                                                                                                      | RDH10                                                                                                                                                    | 2.30 |
| H29479    | Spectrin, beta, non-erythrocytic 1                                                                                                                                                                                                                                        | SPTBN1                                                                                                                                                   | 2.28 |
| BM668595  | G patch domain containing 2+                                                                                                                                                                                                                                              | gpatch2                                                                                                                                                  | 2.28 |
| AI560205  | Kiaa1841                                                                                                                                                                                                                                                                  | KIAA1841                                                                                                                                                 | 2.28 |
| BC014311  | Fch domain only 2                                                                                                                                                                                                                                                         | FCHO2                                                                                                                                                    | 2.28 |
| AA678124  | Epidermal growth factor receptor (erythroblastic leukemia viral (v-erb-b) oncogene homolog, avian)                                                                                                                                                                        | EGFR                                                                                                                                                     | 2.27 |
| BC004921  | Sp140 nuclear body protein-like                                                                                                                                                                                                                                           | SP140L                                                                                                                                                   | 2.26 |
| U66046    | Uncharacterized loc100272228                                                                                                                                                                                                                                              | LOC100272228                                                                                                                                             | 2.26 |
| BE789211  | Dihydroorotate dehydrogenase (quinone)                                                                                                                                                                                                                                    | DHODH                                                                                                                                                    | 2.26 |
| AI023795  | Nlr family, card domain containing 4                                                                                                                                                                                                                                      | NLRC4                                                                                                                                                    | 2.25 |
| AA524023  | Tumor protein d52                                                                                                                                                                                                                                                         | TPD52                                                                                                                                                    | 2.25 |

|           |                                                             |                         |      |
|-----------|-------------------------------------------------------------|-------------------------|------|
| AL832081  | Uncharacterized loc100506639 /// zinc finger protein 131    | LOC100506639 /// ZNF131 | 2.25 |
| AI808807  | Sry (sex determining region y)-box 7                        | SOX7                    | 2.25 |
| BU192089  | Long intergenic non-protein coding rna 515                  | LINC00515               | 2.25 |
| NM_006869 | Arfgap with dual ph domains 1                               | ADAP1                   | 2.25 |
| NM_145032 | F-box and leucine-rich repeat protein 13                    | FBXL13                  | 2.24 |
| W74371    | Wd repeat domain 41                                         | WDR41                   | 2.24 |
| BC004969  | Torsin a interacting protein 1                              | TOR1AIP1                | 2.24 |
| AK024890  | Pyrin and hin domain family, member 1                       | PYHIN1                  | 2.24 |
| AI311040  | Endonuclease v /// uncharacterized loc100507440             | ENDOV /// LOC100507440  | 2.24 |
| D28468    | D site of albumin promoter (albumin d-box) binding protein  | DBP                     | 2.23 |
| BU588923  | Nadh dehydrogenase (ubiquinone) 1 beta subcomplex, 6, 17kda | NDUFB6                  | 2.21 |
| BM972759  | Zinc finger protein 230                                     | ZNF230                  | 2.21 |
| AI815001  | Small nucleolar rna, h/aca box 72                           | SNORA72                 | 2.21 |
| AA744843  | Similar to zinc finger protein riz                          | ---                     | 2.21 |
| AI123586  | Interleukin 31 receptor a                                   | IL31RA                  | 2.21 |
| NM_022568 | Aldehyde dehydrogenase 8 family, member a1                  | ALDH8A1                 | 2.21 |
| AF542097  | Zinc finger protein 24                                      | ZNF24                   | 2.21 |
| AA927995  | Rap guanine nucleotide exchange factor (gef) 1              | RAPGEF1                 | 2.20 |
| NM_006771 | Keratin 38                                                  | KRT38                   | 2.20 |
| BE327727  | Centrosomal protein 63kda                                   | CEP63                   | 2.19 |
| AI082216  | Family with sequence similarity 161, member b               | FAM161B                 | 2.19 |
| BQ022804  | Layilin                                                     | LAYN                    | 2.19 |
| BF592058  | Yth domain containing 1                                     | YTHDC1                  | 2.19 |
| BE551864  | Uncharacterized loc440149                                   | LOC440149               | 2.19 |
| AW361702  | Proteasome (prosome, macropain) 26s subunit, non-atpase, 7  | psmd7                   | 2.19 |
| BF055060  | ---                                                         | ---                     | 2.18 |
| AK001092  | Phosphatidic acid phosphatase type 2b                       | Ppap2b                  | 2.18 |
| NM_017795 | Ribonuclease t2                                             | RNASSET2                | 2.18 |
| AY174896  | Creb3 regulatory factor                                     | CREBRF                  | 2.18 |
| NM_018306 | Transmembrane protein 40                                    | TMEM40                  | 2.17 |
| BE549540  | Cysteinyl leukotriene receptor 1                            | CYSLTR1                 | 2.17 |
| NM_004335 | Bone marrow stromal cell antigen 2                          | BST2                    | 2.17 |
| BG010493  | Nadh dehydrogenase (ubiquinone) 1 beta subcomplex, 9, 22kda | NDUFB9                  | 2.17 |

|           |                                                                       |              |      |
|-----------|-----------------------------------------------------------------------|--------------|------|
| BE542323  | Vestigial like 1 (drosophila)                                         | VGLL1        | 2.17 |
| AI630979  | Failed axon connections homolog (drosophila)                          | FAXC         | 2.17 |
| BC042908  | Ribosomal rna processing 12 homolog (s. Cerevisiae)                   | RRP12        | 2.16 |
| AY009402  | Wingless-type mmtv integration site family, member 8a                 | WNT8A        | 2.16 |
| AV753544  | Phosphoglucosyltransferase 2-like 1                                   | PGM2L1       | 2.16 |
| AI004800  | ---                                                                   | ---          | 2.16 |
| AW182934  | Ribonuclease p/mrp 30kda subunit                                      | RPP30        | 2.16 |
| AA447830  | Small nucleolar rna host gene 10 (non-protein coding)                 | SNHG10       | 2.16 |
| AK027041  | Fat storage-inducing transmembrane protein 2                          | fitm2        | 2.15 |
| AV693985  | Ets variant 2                                                         | ETV2         | 2.15 |
| NM_004284 | Chromodomain helicase dna binding protein 1-like                      | CHD1L        | 2.15 |
| H17941    | Monoglyceride lipase                                                  |              | 2.15 |
| NM_145756 | Zinc finger protein 396                                               | ZNF396       | 2.15 |
| AL832042  | Protein tyrosine phosphatase, receptor type, e                        | PTPRE        | 2.14 |
| BE972419  | Uncharacterized loc100190986                                          | LOC100190986 | 2.14 |
| AA679858  | Splicing factor, arginine/serine-rich 2, interacting protein          | SFRS2IP      | 2.14 |
| AV650426  | Aldolase b, fructose-bisphosphate                                     | ALDOB        | 2.14 |
| U80764    | Nop2/sun domain family, member 6                                      | NSUN6        | 2.14 |
| NM_015852 | Zinc finger protein 117                                               | ZNF117       | 2.14 |
| AK024108  | ---                                                                   | ---          | 2.14 |
| AA354480  | ---                                                                   | ---          | 2.13 |
| AI674786  | Chromosome 1 open reading frame 173                                   | C1orf173     | 2.13 |
| W01715    | N-acyl phosphatidylethanolamine phospholipase d                       | NAPEPLD      | 2.13 |
| NM_024296 | Coiled-coil domain containing 28b                                     | CCDC28B      | 2.13 |
| AF090942  | Protein phosphatase 3 (formerly 2b), catalytic subunit, alpha isoform | PPP3CA       | 2.13 |
| AJ431618  | ---                                                                   | ---          | 2.13 |
| AK024879  | ---                                                                   | ---          | 2.13 |
| AL832439  | Long intergenic non-protein coding rna 342                            | LINC00342    | 2.12 |
| AW273830  | Sushi, nidogen and egf-like domains 1                                 | SNED1        | 2.12 |
| BE465173  | Neuroblastoma, suppression of tumorigenicity 1                        | Nbl1         | 2.12 |
| BC040700  | E1a binding protein p300                                              | EP300        | 2.11 |
| NM_023070 | Zinc finger protein 643                                               | ZNF643       | 2.11 |

|          |                                                                                                                                      |                                       |      |
|----------|--------------------------------------------------------------------------------------------------------------------------------------|---------------------------------------|------|
| Z83838   | Rho gtpase activating protein 8 /// prr5-arhgap8 readthrough                                                                         | ARHGAP8 /// PRR5-ARHGAP8              | 2.11 |
| BG149482 | Zinc finger protein 333                                                                                                              | ZNF333                                | 2.11 |
| AB064670 | Ok/sw-cl.36                                                                                                                          | OK/SW-CL.36                           | 2.11 |
| AI028309 | Zinc finger protein 81                                                                                                               | ZNF81                                 | 2.10 |
| AA002064 | Phosphatidylinositol transfer protein, alpha                                                                                         | pitpna                                | 2.10 |
| BC010900 | Ubiquitin-conjugating enzyme e2w (putative)                                                                                          | UBE2W                                 | 2.10 |
| AI023433 | Udp-n-acetyl-alpha-d-galactosamine:polypeptide n-acetylgalactosaminyltransferase 5 (galnact5)                                        | GALNT5                                | 2.10 |
| AA166895 | Nescient helix loop helix 2                                                                                                          | NHLH2                                 | 2.10 |
| AK023839 | ---                                                                                                                                  | ---                                   | 2.10 |
| AK023580 | Family with sequence similarity 129, member b                                                                                        | FAM129B                               | 2.10 |
| AL031313 | Ribosomal protein l22 pseudogene 22 /// - -                                                                                          | RPL22P22 /// RPL22P22                 | 2.10 |
| AA521080 | Long intergenic non-protein coding rna 1410                                                                                          | LINC01410                             | 2.10 |
| AL139377 | Coiled-coil domain containing 169 /// ccdc169-sohlh2 readthrough /// spermatogenesis and oogenesis specific basic helix-loop-helix 2 | CCDC169 /// CCDC169-SOHLH2 /// SOHLH2 | 2.08 |
| X83300   | Glucuronidase, beta pseudogene 3 /// glucuronidase, beta pseudogene 9                                                                | GUSBP3 /// GUSBP9                     | 2.08 |
| AA442490 | Iba57, iron-sulfur cluster assembly homolog (s. Cerevisiae)                                                                          | IBA57                                 | 2.08 |
| AA633627 | Microtubule-associated protein 1a                                                                                                    | MAP1A                                 | 2.08 |
| AK024949 | Epc1 enhancer of polycomb homolog 1                                                                                                  | EPC1                                  | 2.08 |
| AC006042 | Glucocorticoid induced transcript 1                                                                                                  | GLCCI1                                | 2.08 |
| AA603467 | Zinc finger protein 503                                                                                                              | ZNF503                                | 2.08 |
| AW974816 | Ankyrin repeat domain 17                                                                                                             | ANKRD17                               | 2.08 |
| AW665865 | Phospholipase c, eta 1                                                                                                               | PLCH1                                 | 2.08 |
| AI129310 | Kiaa0226-like                                                                                                                        | KIAA0226L                             | 2.08 |
| AB051487 | Dual specificity phosphatase 16                                                                                                      | DUSP16                                | 2.07 |
| BE466825 | Zinc finger protein 565                                                                                                              | ZNF565                                | 2.07 |
| AW195572 | Aftiphilin                                                                                                                           | AFTPH                                 | 2.07 |
| BC038707 | Homo sapiens, similar to neuronal thread protein, clone                                                                              | ---                                   | 2.07 |
| BC001099 | Selenoprotein o                                                                                                                      | SELO                                  | 2.06 |

|           |                                                                                                                            |                    |      |
|-----------|----------------------------------------------------------------------------------------------------------------------------|--------------------|------|
| AK096768  | Pyruvate dehydrogenase phosphatase regulatory subunit pseudogene /// pyruvate dehydrogenase phosphatase regulatory subunit | LOC283922 /// PDPR | 2.06 |
| D17207    | Elovl family member 5, elongation of long chain fatty acids (fen1/elo2, sur4/elo3-like, yeast)                             | Elovl5             | 2.06 |
| BF983202  | Salvador homolog 1 (drosophila)                                                                                            | SAV1               | 2.06 |
| M31213    | Ret proto-oncogene                                                                                                         | RET                | 2.06 |
| AI810764  | Melanophilin                                                                                                               | MLPH               | 2.05 |
| AI380529  | Diphthamine biosynthesis 6                                                                                                 | DPH6               | 2.05 |
| AK000993  | Ccz1 vacuolar protein trafficking and biogenesis associated homolog b (s. Cerevisiae)                                      | CCZ1B              | 2.05 |
| AI733653  | Elp4 elongator acetyltransferase complex subunit 4                                                                         | Elp4               | 2.05 |
| AI807532  | Epoxide hydrolase 4                                                                                                        | EPHX4              | 2.04 |
| AI521254  | Histidine rich carboxyl terminus 1                                                                                         | HRCT1              | 2.04 |
| AI127440  | Fras1 related extracellular matrix 1                                                                                       | FREM1              | 2.04 |
| NM_012240 | Sirtuin 4                                                                                                                  | SIRT4              | 2.04 |
| AL157421  | Spag5 antisense rna 1 (non-protein coding)                                                                                 | SPAG5-AS1          | 2.04 |
| AA868193  | Receptor accessory protein 5                                                                                               | REEP5              | 2.04 |
| AL137383  | Uncharacterized loc153682                                                                                                  | LOC153682          | 2.04 |
| AI701480  | Uncharacterized loc153577                                                                                                  | LOC153577          | 2.04 |
| AI694242  | Pr domain containing 16                                                                                                    | PRDM16             | 2.04 |
| AI753488  | Glutamate-cysteine ligase, modifier subunit                                                                                | GCLM               | 2.03 |
| AF233336  | Epoxide hydrolase 2, cytoplasmic                                                                                           | EPHX2              | 2.03 |
| BF308548  | Tumor suppressor candidate 2                                                                                               | TUSC2              | 2.03 |
| NM_022127 | Solute carrier family 28 (sodium-coupled nucleoside transporter), member 3                                                 | SLC28A3            | 2.03 |
| M59917    | Sphingomyelin phosphodiesterase 1, acid lysosomal                                                                          | SMPD1              | 2.03 |
| BC005335  | Transmembrane protein 87a                                                                                                  | TMEM87A            | 2.03 |
| AU156837  | Uncharacterized loc284561                                                                                                  | LOC284561          | 2.03 |
| BC034477  | Ectonucleoside triphosphate diphosphohydrolase 4                                                                           | ENTPD4             | 2.02 |
| AI821447  | Kruppel-like factor 8                                                                                                      | KLF8               | 2.02 |
| BE880892  | Chromosome 2 open reading frame 27a                                                                                        | C2orf27A           | 2.02 |
| AI150613  | Trk-fused gene                                                                                                             | TFG                | 2.02 |
| AI580966  | Ae binding protein 2                                                                                                       | AEBP2              | 2.02 |
| AW299531  | Homeobox d10                                                                                                               | HOXD10             | 2.02 |
| NM_031294 | Leucine rich repeat containing 48                                                                                          | LRRC48             | 2.02 |
| NM_032763 | Uncharacterized protein mgc16142                                                                                           | MGC16142           | 2.01 |

|           |                                                 |              |      |
|-----------|-------------------------------------------------|--------------|------|
| AI828035  | Glutaminase                                     | GLS          | 2.01 |
| NM_012338 | Tetraspanin 12                                  | TSPAN12      | 2.01 |
| AW235608  | Tetratricopeptide repeat domain 9               | TTC9         | 2.01 |
| AK027069  | ---                                             | ---          | 2.01 |
| BC037286  | Nima (never in mitosis gene a)-related kinase 4 | NEK4         | 2.01 |
| BE543518  | Cytosolic iron-sulfur protein assembly 1        | CIAO1        | 2.01 |
| AI743123  | Zinc finger, zz-type containing 3               | ZZZ3         | 2.01 |
| NM_000753 | Phosphodiesterase 3b, cgmp-inhibited            | PDE3B        | 2.01 |
| AF269088  | Ankyrin repeat domain 30b                       | ANKRD30B     | 2.01 |
| U43383    | Cmt1a duplicated region transcript 1            | CDRT1        | 2.01 |
| NM_003481 | Ubiquitin specific peptidase 5 (isopeptidase t) | USP5         | 2.00 |
| D81004    | ---                                             | ---          | 2.00 |
| BE548749  | Zinc finger protein 546                         | ZNF546       | 2.00 |
| AA455106  | Hypothetical loc285768                          | ---          | 2.00 |
| AI200555  | Uncharacterized loc100505687                    | LOC100505687 | 2.00 |
| NM_024838 | Threonine synthase-like 1 (s. Cerevisiae)       | THNSL1       | 2.00 |
